# Supplementary material for: Circulating Illness and Changes in Thermometer Use Behavior: Series of Cross-sectional Analyses
Source: JMIR Form Res. 2022 Sep 8;6(9):e37509. doi: 10.2196/37509 (PMC9506504; doi:10.2196/37509)
Supplement: Multimedia Appendix 1 [file formative_v6i9e37509_app1.docx]

**Multimedia Appendix 1:** The sensitivity analysis examining demographic characteristics associated with temperature-taking frequency measured by the number of days with a reading. Results of the mixed effects negative binomial regressions for each period. Values shown are the adjusted incidence rate ratios and their associated 95% confidence intervals. Reference groups are listed next to the name of the predictor.

|  | Incidence Rate Ratio (95% CI) | |  |  |  |
| --- | --- | --- | --- | --- | --- |
|  | **Offseason 2019** | **Flu Season** | **Wave 1 COVID** | **Wave 2 COVID** | **Wave 3 COVID** |
|  | **(May 1, 2019 –**  **Oct 31, 2019)** | **(Nov 1, 2019 –Feb 2, 2020)** | **(Feb 3, 2020 –**  **May 31, 2020)** | **(Jun 1, 2020 –**  **Oct 31, 2020)** | **(Nov 1, 2020 –**  **Feb 28, 2021)** |
| **Age (ref: 19-30)** |  |  |  |  |  |
| 0-1 years | 2.10 (2.05, 2.16) | 1.46 (1.43, 1.50) | 1.70 (1.67, 1.74) | 1.14 (1.11, 1.16) | 1.25 (1.22, 1.27) |
| 2-5 years | 1.61 (1.57, 1.65) | 1.59 (1.56, 1.63) | 1.39 (1.37, 1.42) | 0.99 (0.97, 1.01) | 1.13 (1.11, 1.15) |
| 6-11 years | 1.44 (1.41, 1.48) | 1.64 (1.61, 1.67) | 1.29 (1.27, 1.31) | 1.11 (1.09, 1.13) | 1.16 (1.14, 1.18) |
| 12-18 years | 1.20 (1.16, 1.24) | 1.36 (1.33, 1.39) | 1.07 (1.05, 1.09) | 0.96 (0.94, 0.98) | 1.00 (0.98, 1.02) |
| 31-60 years | 0.96 (0.94, 0.99) | 1.02 (1.00, 1.04) | 1.38 (1.36, 1.40) | 1.04 (1.03, 1.06) | 1.14 (1.12, 1.15) |
| >60 years | 1.28 (1.22, 1.34) | 1.21 (1.16, 1.26) | 2.35 (2.32, 2.39) | 1.51 (1.49, 1.54) | 1.62 (1.60, 1.65) |
| **Gender (ref: women)** |  |  |  |  |  |
| Men | 0.93 (0.92, 0.94) | 0.95 (0.94, 0.96) | 0.96 (0.96, 0.97) | 0.99 (0.98, 1.00) | 0.98 (0.97, 0.98) |
| **Density (ref: rural)a** |  |  |  |  |  |
| Urban | 1.07 (1.05, 1.09) | 1.08 (1.06, 1.09) | 1.06 (1.05, 1.07) | 0.92 (0.90, 0.93) | 1.00 (0.99, 1.01) |
| **Poverty (ref: 0-<10%)b** |  |  |  |  |  |
| 10-<20% | 0.97 (0.95, 0.98) | 0.97 (0.96, 0.99) | 1.01 (1.00, 1.02) | 1.00 (0.98, 1.01) | 1.00 (0.99, 1.01) |
| 20-<30% | 0.95 (0.93, 0.98) | 0.97 (0.95, 0.99) | 1.05 (1.03, 1.07) | 0.97 (0.95, 0.99) | 0.95 (0.94, 0.97) |
| **≥**30% | 0.97 (0.93, 1.00) | 0.96 (0.93, 0.99) | 1.10 (1.07, 1.13) | 0.97 (0.95, 0.99) | 0.96 (0.94, 0.98) |
| **FLUency (ref: non-FLUency)c** |  |  |  |  |  |
| FLUency user | 10.46 (10.10, 10.84) | 0.89 (0.88, 0.91) | 0.73 (0.72, 0.75) | 1.56 (1.53, 1.60) | 0.84 (0.83, 0.85) |
| **Household Composition (ref: adult-only)d** |  |  |  |  |  |
| Child-only | 0.52 (0.51, 0.53) | 0.58 (0.57, 0.59) | 0.42 (0.41, 0.43) | 0.63 (0.62, 0.64) | 0.71 (0.70, 0.72) |
| Multi-generational | 0.70 (0.69, 0.72) | 0.72 (0.71, 0.74) | 0.58 (0.58, 0.59) | 0.66 (0.64, 0.67) | 0.72 (0.71, 0.73) |
| **Region (ref: 1 [Northeast])e** |  |  |  |  |  |
| 2 (DC, MD, WV, DE, NJ, PA, VA) | 0.96 (0.93, 0.99) | 0.89 (0.87, 0.92) | 0.90 (0.88, 0.91) | 0.82 (0.80, 0.84) | 0.86 (0.84, 0.87) |
| 3 (GA, FL, NC, SC) | 1.00 (0.97, 1.03) | 0.85 (0.83, 0.87) | 0.83 (0.81, 0.84) | 0.76 (0.74, 0.77) | 0.95 (0.93, 0.97) |
| 4 (KY, TN, AL, MS) | 0.93 (0.89, 0.97) | 0.86 (0.84, 0.89) | 0.79 (0.77, 0.81) | 0.72 (0.70, 0.74) | 0.86 (0.84, 0.89) |
| 5 (IL, WI, IN, MI, MN, OH) | 0.97 (0.94, 1.00) | 0.87 (0.85, 0.89) | 0.86 (0.85, 0.88) | 0.92 (0.90, 0.93) | 0.89 (0.87, 0.91) |
| 6 (OK, AR, LA, NM, TX) | 0.94 (0.91, 0.96) | 0.80 (0.78, 0.82) | 0.79 (0.77, 0.80) | 0.66 (0.64, 0.67) | 0.88 (0.86, 0.90) |
| 7 (NE, IA, KS, MO) | 0.86 (0.82, 0.89) | 0.79 (0.76, 0.81) | 0.80 (0.78, 0.82) | 0.79 (0.77, 0.81) | 0.78 (0.76, 0.80) |
| 8 (MT, ND, WY, CO, SD, UT) | 0.89 (0.85, 0.94) | 0.89 (0.86, 0.93) | 0.91 (0.89, 0.94) | 0.85 (0.82, 0.87) | 0.84 (0.82, 0.87) |
| 9 (CA, NV, AZ, HI) | 0.96 (0.93, 0.99) | 0.92 (0.90, 0.94) | 0.89 (0.87, 0.90) | 0.73 (0.72, 0.74) | 0.90 (0.88, 0.92) |
| 10 (AK, ID, OR, WA) | 1.03 (0.98, 1.08) | 0.81 (0.78, 0.85) | 1.06 (1.03, 1.09) | 0.83 (0.80, 0.85) | 1.00 (0.97, 1.03) |

a Percentage of population living below 100% federal poverty level at Census tract level, from the 2015–2019 American Community Survey.

bCategorized as urban if census tract was part of an urbanized area of 50,000 or more people based on 2010 US Census

cReceived thermometer through Kinsa’s school distribution and engagement program, FLUency

dBased on ages of profiles associated with the devicewith child-only households representing devices where a parent has made profiles for their children but not themself

eClassified using CDC National Center For Chronic Disease Prevention and Health Promotion Regions
